# Supplementary material
Source: MDPI journal article supplement (https://www.mdpi.com/2227-9040/10/3/105)

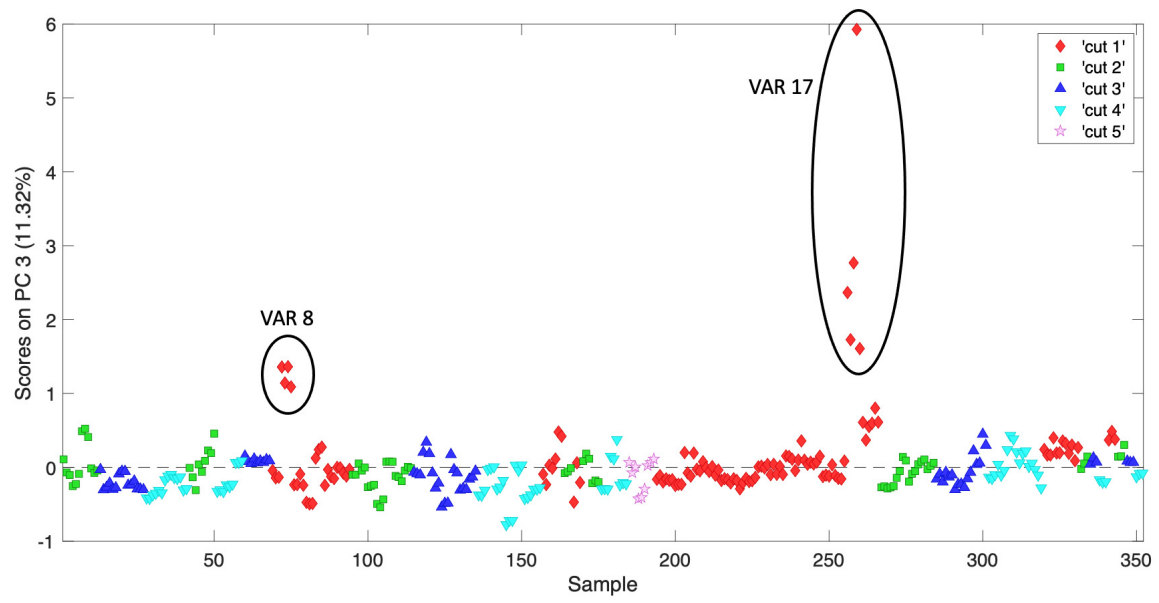

**Figure S1.** PC3 scores vs n° of sample.

Supplement: s1 [file s1 › chemosensors-1600935-supplementary.pdf]
